# Supplementary material for: Finding a Depression App: A Review and Content Analysis of the Depression App Marketplace
Source: PubMed Central journal article supplement (PMC4376135; doi:10.2196/mhealth.3713), 2015-02-16
Supplement: mhealth_v3i1e16_app1.pdf [file mhealth_v3i1e16_app1.pdf]

| MARKET | APP NAME                                  | LINK                                                                                                                                                                            |
|--------|-------------------------------------------|---------------------------------------------------------------------------------------------------------------------------------------------------------------------------------|
| #APPLE | Am I Depressed                            | <a href="https://itunes.apple.com/ca/app/am-i-depressed/id496508649?mt=8">https://itunes.apple.com/ca/app/am-i-depressed/id496508649?mt=8</a>                                   |
| #APPLE | Anxiety Relief Hypnosis                   | <a href="https://itunes.apple.com/ca/app/anxiety-relief-hypnosis/id593387852?mt=8">https://itunes.apple.com/ca/app/anxiety-relief-hypnosis/id593387852?mt=8</a>                 |
| #APPLE | Be Happy - Anxiety and Depression         | <a href="https://itunes.apple.com/ca/app/be-happy-anxiety-depression/id337400410?mt=8">https://itunes.apple.com/ca/app/be-happy-anxiety-depression/id337400410?mt=8</a>         |
| #APPLE | Be Stress Free Fast Stress Test           | <a href="https://itunes.apple.com/ca/app/be-stress-free-fast-stress/id335319016?mt=8">https://itunes.apple.com/ca/app/be-stress-free-fast-stress/id335319016?mt=8</a>           |
| #APPLE | Beat Depression                           | <a href="https://itunes.apple.com/ca/app/beat-depression/id602796385?mt=8">https://itunes.apple.com/ca/app/beat-depression/id602796385?mt=8</a>                                 |
| #APPLE | Better Mood Tracker                       | <a href="https://itunes.apple.com/ca/app/better-mood-tracker/id572360495?mt=8">https://itunes.apple.com/ca/app/better-mood-tracker/id572360495?mt=8</a>                         |
| #APPLE | Brain Freqz - Depression Relief           | <a href="https://itunes.apple.com/ca/app/brainfreqz-depression-relief/id306244990?mt=8">https://itunes.apple.com/ca/app/brainfreqz-depression-relief/id306244990?mt=8</a>       |
| #APPLE | Deal with Depression                      | <a href="https://itunes.apple.com/ca/app/deal-with-depression/id513562379?mt=8">https://itunes.apple.com/ca/app/deal-with-depression/id513562379?mt=8</a>                       |
| #APPLE | Dealing With Negative Emotions            | <a href="https://itunes.apple.com/ca/app/dealing-negative-emotions/id464359078?mt=8">https://itunes.apple.com/ca/app/dealing-negative-emotions/id464359078?mt=8</a>             |
| #APPLE | Defeat Depression                         | <a href="https://itunes.apple.com/ca/app/defeat-depression/id399584993?mt=8">https://itunes.apple.com/ca/app/defeat-depression/id399584993?mt=8</a>                             |
| #APPLE | Depressed                                 | <a href="https://itunes.apple.com/ca/app/depressed/id545930572?mt=8">https://itunes.apple.com/ca/app/depressed/id545930572?mt=8</a>                                             |
| #APPLE | Depression - Plain English                | <a href="https://itunes.apple.com/ca/app/depression-plain-english-health/id402704764?mt=8">https://itunes.apple.com/ca/app/depression-plain-english-health/id402704764?mt=8</a> |
| #APPLE | Depression By ASKONE                      | <a href="https://itunes.apple.com/ca/app/idepression/id377702166?mt=8">https://itunes.apple.com/ca/app/idepression/id377702166?mt=8</a>                                         |
| #APPLE | Depression Calculator                     | <a href="https://itunes.apple.com/ca/app/depression-calculator/id517937129?mt=8">https://itunes.apple.com/ca/app/depression-calculator/id517937129?mt=8</a>                     |
| #APPLE | Depression Check                          | <a href="https://itunes.apple.com/ca/app/depressioncheck/id398170644?mt=8">https://itunes.apple.com/ca/app/depressioncheck/id398170644?mt=8</a>                                 |
| #APPLE | Depression Consultant                     | <a href="https://itunes.apple.com/ca/app/depression-consultant/id502969441?mt=8">https://itunes.apple.com/ca/app/depression-consultant/id502969441?mt=8</a>                     |
| #APPLE | Depression Cure - The Free 12 week course | <a href="https://itunes.apple.com/us/app/depression-cure-free-12-week/id546948783?mt=8">https://itunes.apple.com/us/app/depression-cure-free-12-week/id546948783?mt=8</a>       |
| #APPLE | Depression Fighter                        | <a href="https://itunes.apple.com/ca/app/depression-fighter-practical/id471879726?mt=8">https://itunes.apple.com/ca/app/depression-fighter-practical/id471879726?mt=8</a>       |
| #APPLE | Depression Guide                          | <a href="https://itunes.apple.com/ca/app/depression-guide/id377887296?mt=8">https://itunes.apple.com/ca/app/depression-guide/id377887296?mt=8</a>                               |
| #APPLE | Depression Help Brainwave                 | <a href="https://itunes.apple.com/ca/app/depression-help-brainwave/id416501896?mt=8">https://itunes.apple.com/ca/app/depression-help-brainwave/id416501896?mt=8</a>             |
| #APPLE | Depression Journal                        | <a href="https://itunes.apple.com/ca/app/depression-">https://itunes.apple.com/ca/app/depression-</a>                                                                           |

| MARKET | APP NAME                                | LINK                                                                                                                                                                          |
|--------|-----------------------------------------|-------------------------------------------------------------------------------------------------------------------------------------------------------------------------------|
|        |                                         | <a href="https://itunes.apple.com/ca/app/journal/id320585382?mt=8">journal/id320585382?mt=8</a>                                                                               |
| #APPLE | Depression Monitor                      | <a href="https://itunes.apple.com/ca/app/depression-monitor/id528600269?mt=8">https://itunes.apple.com/ca/app/depression-monitor/id528600269?mt=8</a>                         |
| #APPLE | Depression Mood Monitor                 | <a href="https://itunes.apple.com/ca/app/depression-mood-monitor/id467815397?mt=8">https://itunes.apple.com/ca/app/depression-mood-monitor/id467815397?mt=8</a>               |
| #APPLE | Depression Relief and Mood - HappyApp   | <a href="https://itunes.apple.com/ca/app/depression-relief-mood-support/id464669769?mt=8">https://itunes.apple.com/ca/app/depression-relief-mood-support/id464669769?mt=8</a> |
| #APPLE | Depression Screeing                     | <a href="http://bit.ly/10bie4i">http://bit.ly/10bie4i</a>                                                                                                                     |
| #APPLE | Depression Screening Pro                | <a href="https://itunes.apple.com/ca/app/depression-screening-pro/id587464255?mt=8">https://itunes.apple.com/ca/app/depression-screening-pro/id587464255?mt=8</a>             |
| #APPLE | Depression Test & Tracker               | <a href="https://itunes.apple.com/ca/app/depression-test-tracker/id341509748?mt=8">https://itunes.apple.com/ca/app/depression-test-tracker/id341509748?mt=8</a>               |
| #APPLE | Depression Treatment                    | <a href="https://itunes.apple.com/ca/app/depression-treatment/id345598701?mt=8">https://itunes.apple.com/ca/app/depression-treatment/id345598701?mt=8</a>                     |
| #APPLE | DepressPill Game for Happy              | <a href="https://itunes.apple.com/ca/app/depresspill-game-for-happy/id420375805?mt=8">https://itunes.apple.com/ca/app/depresspill-game-for-happy/id420375805?mt=8</a>         |
| #APPLE | DepressPill LITE - Game for Happy Habit | <a href="https://itunes.apple.com/ca/app/depresspill-lite-game-for/id424161567?mt=8">https://itunes.apple.com/ca/app/depresspill-lite-game-for/id424161567?mt=8</a>           |
| #APPLE | DigitalMeds                             | <a href="https://itunes.apple.com/ca/app/digitalmeds/id571275152?mt=8">https://itunes.apple.com/ca/app/digitalmeds/id571275152?mt=8</a>                                       |
| #APPLE | DigitalMeds Lite                        | <a href="https://itunes.apple.com/ca/app/digitalmeds-lite/id571303484?mt=8">https://itunes.apple.com/ca/app/digitalmeds-lite/id571303484?mt=8</a>                             |
| #APPLE | Do I Have Depression                    | <a href="https://itunes.apple.com/ca/app/do-i-have-depression/id460556669?mt=8">https://itunes.apple.com/ca/app/do-i-have-depression/id460556669?mt=8</a>                     |
| #APPLE | Do I Have Depression (HD)               | <a href="https://itunes.apple.com/ca/app/do-i-have-depression-hd/id463800297?mt=8">https://itunes.apple.com/ca/app/do-i-have-depression-hd/id463800297?mt=8</a>               |
| #APPLE | Duas for Depression and Agony           | <a href="https://itunes.apple.com/ca/app/duas-for-depression-and-agony/id384080076?mt=8">https://itunes.apple.com/ca/app/duas-for-depression-and-agony/id384080076?mt=8</a>   |
| #APPLE | Easing Anxiety and Depression           | <a href="https://itunes.apple.com/ca/app/easing-anxiety-depression/id529562246?mt=8">https://itunes.apple.com/ca/app/easing-anxiety-depression/id529562246?mt=8</a>           |
| #APPLE | eCBT Mood                               | <a href="https://itunes.apple.com/ca/app/ecbt-mood/id324060472?mt=8">https://itunes.apple.com/ca/app/ecbt-mood/id324060472?mt=8</a>                                           |
| #APPLE | eLifeguard App                          | <a href="https://itunes.apple.com/ca/app/elifeguard-app/id499947494?mt=8">https://itunes.apple.com/ca/app/elifeguard-app/id499947494?mt=8</a>                                 |
| #APPLE | Fix Depression                          | <a href="https://itunes.apple.com/ca/app/fix-depression/id489451675?mt=8">https://itunes.apple.com/ca/app/fix-depression/id489451675?mt=8</a>                                 |
| #APPLE | Fix Depression (Lite)                   | <a href="https://itunes.apple.com/ca/app/fix-depression-lite/id505786709?mt=8">https://itunes.apple.com/ca/app/fix-depression-lite/id505786709?mt=8</a>                       |
| #APPLE | Geriatric Depression Scale              | <a href="https://itunes.apple.com/ca/app/geriatric-depression-scale/id433446297?mt=8">https://itunes.apple.com/ca/app/geriatric-depression-scale/id433446297?mt=8</a>         |
| #APPLE | Habit Changer Feeling Happier           | <a href="https://itunes.apple.com/ca/app/habit-changer-feeling-happier/id433446297?mt=8">https://itunes.apple.com/ca/app/habit-changer-feeling-happier/id433446297?mt=8</a>   |

| MARKET | APP NAME                                | LINK                                                                                                                                                                              |
|--------|-----------------------------------------|-----------------------------------------------------------------------------------------------------------------------------------------------------------------------------------|
|        |                                         | <a href="https://itunes.apple.com/ca/app/happier/id376949733?mt=8">happier/id376949733?mt=8</a>                                                                                   |
| #APPLE | Happy App - Beat Depression             | <a href="https://itunes.apple.com/ca/app/happy-app-beat-depression/id449889863?mt=8">https://itunes.apple.com/ca/app/happy-app-beat-depression/id449889863?mt=8</a>               |
| #APPLE | How to understand and Have a Happy Mind | <a href="https://itunes.apple.com/ca/app/how-to-understand-have-happy/id339463419?mt=8">https://itunes.apple.com/ca/app/how-to-understand-have-happy/id339463419?mt=8</a>         |
| #APPLE | I Smile Today                           | <a href="https://itunes.apple.com/ca/app/i-smile-today/id376739061?mt=8">https://itunes.apple.com/ca/app/i-smile-today/id376739061?mt=8</a>                                       |
| #APPLE | iCouch CBT                              | <a href="https://itunes.apple.com/ca/app/icouch-cbt/id446115508?mt=8">https://itunes.apple.com/ca/app/icouch-cbt/id446115508?mt=8</a>                                             |
| #APPLE | iCounselor Depression                   | <a href="https://itunes.apple.com/ca/app/icounselor-depression/id346703658?mt=8">https://itunes.apple.com/ca/app/icounselor-depression/id346703658?mt=8</a>                       |
| #APPLE | iDepression Tracker                     | <a href="https://itunes.apple.com/ca/app/idepressiontracker/id503787796?mt=8">https://itunes.apple.com/ca/app/idepressiontracker/id503787796?mt=8</a>                             |
| #APPLE | iMind & Mood                            | <a href="https://itunes.apple.com/ca/app/imind-mood/id515748296?mt=8">https://itunes.apple.com/ca/app/imind-mood/id515748296?mt=8</a>                                             |
| #APPLE | iSelfhelp - Depression                  | <a href="https://itunes.apple.com/ca/app/iselfhelp-depression/id481240621?mt=8">https://itunes.apple.com/ca/app/iselfhelp-depression/id481240621?mt=8</a>                         |
| #APPLE | iSelfhelp - Mental Health Test          | <a href="https://itunes.apple.com/ca/app/iselfhelp-mental-health-test/id483328770?mt=8">https://itunes.apple.com/ca/app/iselfhelp-mental-health-test/id483328770?mt=8</a>         |
| #APPLE | iSelfhelp Stockbroker                   | <a href="https://itunes.apple.com/ca/app/iselfhelp-stockbrokers-psychtest/id491679837?mt=8">https://itunes.apple.com/ca/app/iselfhelp-stockbrokers-psychtest/id491679837?mt=8</a> |
| #APPLE | Jesus Children Business Card            | <a href="https://itunes.apple.com/ca/app/jesus-children-business-card/id433806190?mt=8">https://itunes.apple.com/ca/app/jesus-children-business-card/id433806190?mt=8</a>         |
| #APPLE | Life Improvement Tips                   | <a href="https://itunes.apple.com/ca/app/life-improvement-tips/id385465065?mt=8">https://itunes.apple.com/ca/app/life-improvement-tips/id385465065?mt=8</a>                       |
| #APPLE | Living out of Darkness                  | <a href="https://itunes.apple.com/ca/app/living-out-of-darkness/id336931147?mt=8">https://itunes.apple.com/ca/app/living-out-of-darkness/id336931147?mt=8</a>                     |
| #APPLE | Mental Elf                              | <a href="https://itunes.apple.com/ca/app/mental-elf/id542192849?mt=8">https://itunes.apple.com/ca/app/mental-elf/id542192849?mt=8</a>                                             |
| #APPLE | Mental Rec                              | <a href="https://itunes.apple.com/ca/app/mental-rec/id391071946?mt=8">https://itunes.apple.com/ca/app/mental-rec/id391071946?mt=8</a>                                             |
| #APPLE | Mentally Fit                            | <a href="https://itunes.apple.com/ca/app/mentally-fit/id548304170?mt=8">https://itunes.apple.com/ca/app/mentally-fit/id548304170?mt=8</a>                                         |
| #APPLE | Mood Sentry                             | <a href="https://itunes.apple.com/ca/app/moodsentry/id576269929?mt=8">https://itunes.apple.com/ca/app/moodsentry/id576269929?mt=8</a>                                             |
| #APPLE | Mood Watch                              | <a href="https://itunes.apple.com/ca/app/mood-watch/id590103778?mt=8">https://itunes.apple.com/ca/app/mood-watch/id590103778?mt=8</a>                                             |
| #APPLE | MoodMaster Anti-Depression              | <a href="https://itunes.apple.com/ca/app/moodmaster-anti-depression/id463445969?mt=8">https://itunes.apple.com/ca/app/moodmaster-anti-depression/id463445969?mt=8</a>             |
| #APPLE | MusicClinic: 4 In 1                     | <a href="https://itunes.apple.com/ca/app/musicclinic-4-in-1/id336264547?mt=8">https://itunes.apple.com/ca/app/musicclinic-4-in-1/id336264547?mt=8</a>                             |

| MARKET | APP NAME                           | LINK                                                                                                                                                                                  |
|--------|------------------------------------|---------------------------------------------------------------------------------------------------------------------------------------------------------------------------------------|
| #APPLE | MusicClinic: DepressionManagement  | <a href="https://itunes.apple.com/ca/app/musicclinic-depressionmanagement/id329223356?mt=8">https://itunes.apple.com/ca/app/musicclinic-depressionmanagement/id329223356?mt=8</a>     |
| #APPLE | MusicClinic: Sleep                 | <a href="https://itunes.apple.com/ca/app/music-clinic-sleep/id390019591?mt=8">https://itunes.apple.com/ca/app/music-clinic-sleep/id390019591?mt=8</a>                                 |
| #APPLE | my Smiley Calendar                 | <a href="https://itunes.apple.com/ca/app/my-smiley-calendar/id575454311?mt=8">https://itunes.apple.com/ca/app/my-smiley-calendar/id575454311?mt=8</a>                                 |
| #APPLE | MyMentalQuiz                       | <a href="https://itunes.apple.com/ca/app/mymentalquiz/id425153883?mt=8">https://itunes.apple.com/ca/app/mymentalquiz/id425153883?mt=8</a>                                             |
| #APPLE | MyMentalState for iPhone           | <a href="https://itunes.apple.com/ca/app/mymentalstate-for-iphone/id431194260?mt=8">https://itunes.apple.com/ca/app/mymentalstate-for-iphone/id431194260?mt=8</a>                     |
| #APPLE | Operation Reach Out                | <a href="https://itunes.apple.com/ca/app/operation-reach-out/id478899653?mt=8">https://itunes.apple.com/ca/app/operation-reach-out/id478899653?mt=8</a>                               |
| #APPLE | Optimism                           | <a href="https://itunes.apple.com/ca/app/optimism/id352262677?mt=8">https://itunes.apple.com/ca/app/optimism/id352262677?mt=8</a>                                                     |
| #APPLE | Overcoming Depression              | <a href="https://itunes.apple.com/ca/app/overcoming-depression/id402402292?mt=8">https://itunes.apple.com/ca/app/overcoming-depression/id402402292?mt=8</a>                           |
| #APPLE | Pain & Depression Relief           | <a href="https://itunes.apple.com/ca/app/pain-depression-relief-ambiscience/id441043960?mt=8">https://itunes.apple.com/ca/app/pain-depression-relief-ambiscience/id441043960?mt=8</a> |
| #APPLE | PHQ-9                              | <a href="https://itunes.apple.com/ca/app/phq-9/id533001786?mt=8">https://itunes.apple.com/ca/app/phq-9/id533001786?mt=8</a>                                                           |
| #APPLE | PocketShrink Depression 1.0        | <a href="https://itunes.apple.com/ca/app/pocketshrink-depression-1.0/id564119019?mt=8">https://itunes.apple.com/ca/app/pocketshrink-depression-1.0/id564119019?mt=8</a>               |
| #APPLE | Postnatal Depression Test          | <a href="https://itunes.apple.com/ca/app/postnatal-depression-test/id598368749?mt=8">https://itunes.apple.com/ca/app/postnatal-depression-test/id598368749?mt=8</a>                   |
| #APPLE | Postnatal Depression Test PRO      | <a href="https://itunes.apple.com/ca/app/postnatal-depression-test/id600038327?mt=8">https://itunes.apple.com/ca/app/postnatal-depression-test/id600038327?mt=8</a>                   |
| #APPLE | PPD Gone!                          | <a href="https://itunes.apple.com/ca/app/ppd-gone!/id529141505?mt=8">https://itunes.apple.com/ca/app/ppd-gone!/id529141505?mt=8</a>                                                   |
| #APPLE | Psychiatry (Understanding Disease) | <a href="https://itunes.apple.com/ca/app/psychiatry-understanding-disease/id411303269?mt=8">https://itunes.apple.com/ca/app/psychiatry-understanding-disease/id411303269?mt=8</a>     |
| #APPLE | Sad Scale                          | <a href="https://itunes.apple.com/ca/app/sad-scale/id308056730?mt=8">https://itunes.apple.com/ca/app/sad-scale/id308056730?mt=8</a>                                                   |
| #APPLE | Sad Scale Lite                     | <a href="https://itunes.apple.com/ca/app/sad-scale-lite/id332139818?mt=8">https://itunes.apple.com/ca/app/sad-scale-lite/id332139818?mt=8</a>                                         |
| #APPLE | Self Esteem Hypnosis               | <a href="https://itunes.apple.com/ca/app/self-esteem-hypnosis/id501209110?mt=8">https://itunes.apple.com/ca/app/self-esteem-hypnosis/id501209110?mt=8</a>                             |
| #APPLE | Senior Mood Assessment             | <a href="https://itunes.apple.com/ca/app/senior-mood-assessment-depressed/id430169679?mt=8">https://itunes.apple.com/ca/app/senior-mood-assessment-depressed/id430169679?mt=8</a>     |
| #APPLE | Seven Minute Stress Cure           | <a href="https://itunes.apple.com/ca/app/seven-minute-stress-cure/id342816465?mt=8">https://itunes.apple.com/ca/app/seven-minute-stress-cure/id342816465?mt=8</a>                     |
| #APPLE | SleepNotes - Lifestyle             | <a href="https://itunes.apple.com/ca/app/sleepnotes-lifestyle-">https://itunes.apple.com/ca/app/sleepnotes-lifestyle-</a>                                                             |

| MARKET | APP NAME                                           | LINK                                                                                                                                                                                                                                                                                                                                                                                                                                |
|--------|----------------------------------------------------|-------------------------------------------------------------------------------------------------------------------------------------------------------------------------------------------------------------------------------------------------------------------------------------------------------------------------------------------------------------------------------------------------------------------------------------|
|        |                                                    | <a href="http://administrator/id574187245?mt=8">administrator/id574187245?mt=8</a>                                                                                                                                                                                                                                                                                                                                                  |
| #APPLE | STAT Depression Screening                          | <a href="http://bit.ly/YUzsy5">http://bit.ly/YUzsy5</a>                                                                                                                                                                                                                                                                                                                                                                             |
| #APPLE | Stop Depression and Anxiety                        | <a href="https://itunes.apple.com/ca/app/stop-depression-anxiety-relax/id464293557?mt=8">https://itunes.apple.com/ca/app/stop-depression-anxiety-relax/id464293557?mt=8</a>                                                                                                                                                                                                                                                         |
| #APPLE | Tap MotivateMe                                     | <a href="https://itunes.apple.com/ca/app/tap-motivateme/id543876271?mt=8">https://itunes.apple.com/ca/app/tap-motivateme/id543876271?mt=8</a>                                                                                                                                                                                                                                                                                       |
| #APPLE | The Mindful Way Thought                            | <a href="https://itunes.apple.com/ca/app/mindful-way-through-depression/id526530776?mt=8">https://itunes.apple.com/ca/app/mindful-way-through-depression/id526530776?mt=8</a>                                                                                                                                                                                                                                                       |
| #APPLE | VirtualClinic - The Get happy                      | <a href="https://itunes.apple.com/ca/app/virtualclinic-get-happy-program/id493461510?mt=8">https://itunes.apple.com/ca/app/virtualclinic-get-happy-program/id493461510?mt=8</a>                                                                                                                                                                                                                                                     |
| #APPLE | Your Life with Depression                          | <a href="https://itunes.apple.com/ca/app/your-life-depression-patient/id561909060?mt=8">https://itunes.apple.com/ca/app/your-life-depression-patient/id561909060?mt=8</a>                                                                                                                                                                                                                                                           |
| #APPLE | Zung                                               | <a href="https://itunes.apple.com/ca/app/zung/id440333901?mt=8">https://itunes.apple.com/ca/app/zung/id440333901?mt=8</a>                                                                                                                                                                                                                                                                                                           |
| #BB    | Defeat Depression                                  | <a href="http://appworld.blackberry.com/webstore/content/22053878/?countrycode=CA">http://appworld.blackberry.com/webstore/content/22053878/?countrycode=CA</a>                                                                                                                                                                                                                                                                     |
| #BB    | Depression Test PHQ-9                              | <a href="http://appworld.blackberry.com/webstore/content/20399226/?countrycode=CA">http://appworld.blackberry.com/webstore/content/20399226/?countrycode=CA</a>                                                                                                                                                                                                                                                                     |
| #BB    | Help Yourself: Depression                          | <a href="http://appworld.blackberry.com/webstore/content/32701/?countrycode=CA">http://appworld.blackberry.com/webstore/content/32701/?countrycode=CA</a>                                                                                                                                                                                                                                                                           |
| #BB    | National Institute of Health Depression Consultant | <a href="http://appworld.blackberry.com/webstore/content/1610/?countrycode=CA">http://appworld.blackberry.com/webstore/content/1610/?countrycode=CA</a>                                                                                                                                                                                                                                                                             |
| #BB    | Teach Yourself Cognitive Behavioural Therapy       | <a href="http://appworld.blackberry.com/webstore/content/22017176/?countrycode=CA">http://appworld.blackberry.com/webstore/content/22017176/?countrycode=CA</a>                                                                                                                                                                                                                                                                     |
| #BB    | The Depression Predictor                           | <a href="http://appworld.blackberry.com/webstore/content/23377875/?countrycode=CA">http://appworld.blackberry.com/webstore/content/23377875/?countrycode=CA</a>                                                                                                                                                                                                                                                                     |
| #GOOG  | Am I Depressed?                                    | <a href="https://play.google.com/store/apps/details?id=com.softomatrix.amidepressed&amp;feature=search_result#?t=W251bGwsMSwxLDEsImNvbS5zb2Z0b21hdHJpcC5hbWlkZXByZXNzZWQiXQ">https://play.google.com/store/apps/details?id=com.softomatrix.amidepressed&amp;feature=search_result#?t=W251bGwsMSwxLDEsImNvbS5zb2Z0b21hdHJpcC5hbWlkZXByZXNzZWQiXQ</a>                                                                                 |
| #GOOG  | Anti-Depression and Anxiety                        | <a href="https://play.google.com/store/apps/details?id=com.wAntiDepressionAudioRhythms&amp;feature=search_result#?t=W251bGwsMSwxLDEsImNvbS53QW50aURlcHJlc3Npb25BdWRpb1JoeXRobXMiXQ">https://play.google.com/store/apps/details?id=com.wAntiDepressionAudioRhythms&amp;feature=search_result#?t=W251bGwsMSwxLDEsImNvbS53QW50aURlcHJlc3Npb25BdWRpb1JoeXRobXMiXQ</a>                                                                   |
| #GOOG  | Anti-Depression Grocery List                       | <a href="https://play.google.com/store/apps/details?id=air.com.lisieredia.AntiDepressionGroceryList&amp;feature=search_result#?t=W251bGwsMSwxLDEsImFpci5jb20ubGZaWVY2ZW1lZGlhLkFudGIEZXByZXNzaW9uR3JvY2VyeUxpc3QiXQ">https://play.google.com/store/apps/details?id=air.com.lisieredia.AntiDepressionGroceryList&amp;feature=search_result#?t=W251bGwsMSwxLDEsImFpci5jb20ubGZaWVY2ZW1lZGlhLkFudGIEZXByZXNzaW9uR3JvY2VyeUxpc3QiXQ</a> |

| MARKET | APP NAME                             | LINK                                                                                                                                                                                                                                                                                                                                                                                                                                                              |
|--------|--------------------------------------|-------------------------------------------------------------------------------------------------------------------------------------------------------------------------------------------------------------------------------------------------------------------------------------------------------------------------------------------------------------------------------------------------------------------------------------------------------------------|
| #GOOG  | Anxiety & Panic Relief Therapy       | <a href="https://play.google.com/store/apps/details?id=mobi.brapp.ashicra&amp;feature=search_result#?t=W251bGwsMSwxLDEsIm1vYmkuYnJhcHAuYXNoaWNyYSJd">https://play.google.com/store/apps/details?id=mobi.brapp.ashicra&amp;feature=search_result#?t=W251bGwsMSwxLDEsIm1vYmkuYnJhcHAuYXNoaWNyYSJd</a>                                                                                                                                                               |
| #GOOG  | Anxiety and Depression               | <a href="https://play.google.com/store/apps/details?id=com.guide.Anxiety.and.Depression&amp;feature=search_result#?t=W251bGwsMSwxLDEsImNvbS5ndWlkZS5BbnhpZXR5LmFuZC5EZXBzZXNzaW9uIl0">https://play.google.com/store/apps/details?id=com.guide.Anxiety.and.Depression&amp;feature=search_result#?t=W251bGwsMSwxLDEsImNvbS5ndWlkZS5BbnhpZXR5LmFuZC5EZXBzZXNzaW9uIl0</a>                                                                                             |
| #GOOG  | Anxiety and Depression               | <a href="https://play.google.com/store/apps/details?id=appinventor.ai_appcreator1970.Anxiety_and_Depression&amp;feature=search_result#?t=W251bGwsMSwxLDEsImFwcGludmVudG9yLmFpX2FwcGNyZWFOb3lxOTcwLkFueGllIHlYw5kX0RlcHJlc3Npb24iXQ">https://play.google.com/store/apps/details?id=appinventor.ai_appcreator1970.Anxiety_and_Depression&amp;feature=search_result#?t=W251bGwsMSwxLDEsImFwcGludmVudG9yLmFpX2FwcGNyZWFOb3lxOTcwLkFueGllIHlYw5kX0RlcHJlc3Npb24iXQ</a> |
| #GOOG  | Anxiety and Depression               | <a href="https://play.google.com/store/apps/details?id=de.actsmartware.app000005986&amp;feature=search_result#?t=W251bGwsMSwxLDEsImRlLmFjdHNtYXJ0d2FyZS5hchAwMDAwMDU5ODYiXQ">https://play.google.com/store/apps/details?id=de.actsmartware.app000005986&amp;feature=search_result#?t=W251bGwsMSwxLDEsImRlLmFjdHNtYXJ0d2FyZS5hchAwMDAwMDU5ODYiXQ</a>                                                                                                               |
| #GOOG  | Anxiety and Depression 101           | <a href="https://play.google.com/store/apps/details?id=com.myappbuilder.AnxietyAndDepression101&amp;feature=search_result#?t=W251bGwsMSwxLDEsImNvbS5teWFwcGJ1aWxkZXIuQW54aWV0eUFuZERlcHJlc3Npb24xMDEiXQ">https://play.google.com/store/apps/details?id=com.myappbuilder.AnxietyAndDepression101&amp;feature=search_result#?t=W251bGwsMSwxLDEsImNvbS5teWFwcGJ1aWxkZXIuQW54aWV0eUFuZERlcHJlc3Npb24xMDEiXQ</a>                                                       |
| #GOOG  | Anxiety Depression                   | <a href="https://play.google.com/store/apps/details?id=com.Depression21.book.AOTFJFHBTTOABNBJKO&amp;feature=search_result#?t=W251bGwsMSwxLDEsImNvbS5EZXBzZXNzaW9uMjEuYm9vay5BT1RGSkZiQIRUT0FCTkJKS08iXQ">https://play.google.com/store/apps/details?id=com.Depression21.book.AOTFJFHBTTOABNBJKO&amp;feature=search_result#?t=W251bGwsMSwxLDEsImNvbS5EZXBzZXNzaW9uMjEuYm9vay5BT1RGSkZiQIRUT0FCTkJKS08iXQ</a>                                                       |
| #GOOG  | Are you at risk for depression?      | <a href="https://play.google.com/store/apps/details?id=com.sounddepressiontreatment.subliminal&amp;feature=search_result#?t=W251bGwsMSwxLDEsImNvbS5zb3VuZGRlcHJlc3Npb250cmVhdG1lbnQuc3VibGltaw5hbCJd">https://play.google.com/store/apps/details?id=com.sounddepressiontreatment.subliminal&amp;feature=search_result#?t=W251bGwsMSwxLDEsImNvbS5zb3VuZGRlcHJlc3Npb250cmVhdG1lbnQuc3VibGltaw5hbCJd</a>                                                             |
| #GOOG  | Audio Book Anxiety and Depression    | <a href="https://play.google.com/store/apps/details?id=anace.com.audiobooks.anxiety_depression&amp;feature=search_result#?t=W251bGwsMSwxLDEsImFuYWNLmNvbS5hdWRpb2Jvb2tzLmFueGllIHlZGVwcmVzc2lvbiJd">https://play.google.com/store/apps/details?id=anace.com.audiobooks.anxiety_depression&amp;feature=search_result#?t=W251bGwsMSwxLDEsImFuYWNLmNvbS5hdWRpb2Jvb2tzLmFueGllIHlZGVwcmVzc2lvbiJd</a>                                                                 |
| #GOOG  | Automatic Positive Thought Generator | <a href="https://play.google.com/store/apps/details?id=appinventor.ai_jonfinlay.APT&amp;feature=search_result">https://play.google.com/store/apps/details?id=appinventor.ai_jonfinlay.APT&amp;feature=search_result</a>                                                                                                                                                                                                                                           |

| MARKET | APP NAME                        | LINK                                                                                                                                                                                                                                                                                                                                                                                                                    |
|--------|---------------------------------|-------------------------------------------------------------------------------------------------------------------------------------------------------------------------------------------------------------------------------------------------------------------------------------------------------------------------------------------------------------------------------------------------------------------------|
|        |                                 | <a href="#">#?<br/>t=W251bGwsMSwxLDEslmFwcGludmVudG9yLmFpX2<br/>pvbmZpbmxheS5BUFAQiXQ</a>                                                                                                                                                                                                                                                                                                                               |
| #GOOG  | Beat Depression                 | <a href="https://play.google.com/store/apps/details?id=beat.depression&amp;feature=search_result#?">https://play.google.com/store/apps/details?<br/>id=beat.depression&amp;feature=search_result#?<br/>t=W251bGwsMSwxLDEslmJlYXQuZGVwcmVzc2lubiJd</a>                                                                                                                                                                   |
| #GOOG  | Beat Depression (Smart Guide)   | <a href="https://play.google.com/store/apps/details?id=com.pixidapp.beatdepressionzip&amp;feature=search_result#?">https://play.google.com/store/apps/details?<br/>id=com.pixidapp.beatdepressionzip&amp;feature=search_result#?<br/>t=W251bGwsMSwxLDEslmNvbS5waXhpZGFwcC5iZW<br/>F0ZGVwcmVzc2lbnppcCJd</a>                                                                                                             |
| #GOOG  | Beat Depression Hypnosis System | <a href="https://play.google.com/store/apps/details?id=com.andromo.dev9483.app146203&amp;feature=search_result#?">https://play.google.com/store/apps/details?<br/>id=com.andromo.dev9483.app146203&amp;feature=search_result#?<br/>t=W251bGwsMSwxLDEslmNvbS5hbmRyb21vLmRldjko<br/>ODMuYXBwMTQ2MjAzIl0</a>                                                                                                               |
| #GOOG  | Beat Depression with Self-Help  | <a href="https://play.google.com/store/apps/details?id=com.digimediaapps.Beat_Depression_with_Self_Help_Techniques&amp;feature=search_result#?">https://play.google.com/store/apps/details?<br/>id=com.digimediaapps.Beat_Depression_with_Self_Hel<br/>p_Techniques&amp;feature=search_result#?<br/>t=W251bGwsMSwxLDEslmNvbS5kaWdpbWVkaWFhcH<br/>BzLkJIYXRfRGVwcmVzc2lubi93aXRoX1NlbgZfSGVscF<br/>9UZWNobmlxdWVzIl0</a> |
| #GOOG  | Beautiful Rain Relaxation       | <a href="https://play.google.com/store/apps/details?id=com.mozinc.beautifulrain&amp;feature=search_result#?">https://play.google.com/store/apps/details?<br/>id=com.mozinc.beautifulrain&amp;feature=search_result#?<br/>t=W251bGwsMSwxLDEslmNvbS5tb3ppbmMuYmVhdX<br/>RpZnVscmFpbiJd</a>                                                                                                                                |
| #GOOG  | Beck Depression Inventory       | <a href="https://play.google.com/store/apps/details?id=Dardiries.BDI.BDI&amp;feature=search_result#?">https://play.google.com/store/apps/details?<br/>id=Dardiries.BDI.BDI&amp;feature=search_result#?<br/>t=W251bGwsMSwxLDEslkRhcmRpcmllcy5CREkuQkRj<br/>Il0</a>                                                                                                                                                       |
| #GOOG  | Beck Depression Inventory BD12  | <a href="https://play.google.com/store/apps/details?id=Dardiries.BDI2.BDI2&amp;feature=search_result#?">https://play.google.com/store/apps/details?<br/>id=Dardiries.BDI2.BDI2&amp;feature=search_result#?<br/>t=W251bGwsMSwxLDEslkRhcmRpcmllcy5CREkyLkJE<br/>STiXQ..</a>                                                                                                                                               |
| #GOOG  | Bi-Polar Disorder               | <a href="https://play.google.com/store/apps/details?id=de.actsmartware.app000006964&amp;feature=search_result#?">https://play.google.com/store/apps/details?<br/>id=de.actsmartware.app000006964&amp;feature=search_re<br/>sult#?<br/>t=W251bGwsMSwxLDEslmRlLmFjdHNtYXJ0d2FyZS5h<br/>cHAWMDAwMDY5NjQiXQ</a>                                                                                                             |
| #GOOG  | Bipolar Disorder!               | <a href="https://play.google.com/store/apps/details?id=com.kinetixapps.bipolardisorder&amp;feature=search_result#?">https://play.google.com/store/apps/details?<br/>id=com.kinetixapps.bipolardisorder&amp;feature=search_res<br/>ult#?</a>                                                                                                                                                                             |

| MARKET | APP NAME                 | LINK                                                                                                                                                                                                                                                                                                                                                                  |
|--------|--------------------------|-----------------------------------------------------------------------------------------------------------------------------------------------------------------------------------------------------------------------------------------------------------------------------------------------------------------------------------------------------------------------|
|        |                          | <a href="https://play.google.com/store/apps/details?id=com.olaworks.automask.comic&amp;feature=search_result#?t=W251bGwsMSwxLDEsImNvbS5vbGF3b3Jrcy5hdXRvbWFzay5jb21pYyJd">t=W251bGwsMSwxLDEsImNvbS5raW5ldGI4YXBwcy5jaXBvbGFyZGlzb3JkZXliXQ</a>                                                                                                                        |
| #GOOG  | Blue Light               | <a href="https://play.google.com/store/apps/details?id=droid.bluelight&amp;feature=search_result#?t=W251bGwsMSwxLDEsImRyb2lkLmJsdWVsaWdodCJd">https://play.google.com/store/apps/details?id=droid.bluelight&amp;feature=search_result#?t=W251bGwsMSwxLDEsImRyb2lkLmJsdWVsaWdodCJd</a>                                                                                 |
| #GOOG  | Blue Wallpapers          | <a href="https://play.google.com/store/apps/details?id=com.blue.wallpapers&amp;feature=search_result#?t=W251bGwsMSwxLDEsImNvbS5ibHVILndhbGxwYXBlcuMiXQ">https://play.google.com/store/apps/details?id=com.blue.wallpapers&amp;feature=search_result#?t=W251bGwsMSwxLDEsImNvbS5ibHVILndhbGxwYXBlcuMiXQ</a>                                                             |
| #GOOG  | CBT Referee              | <a href="https://play.google.com/store/apps/details?id=com.cbreferee&amp;feature=search_result#?t=W251bGwsMSwxLDEsImNvbS5jYnRyZWZlcmVlIl0">https://play.google.com/store/apps/details?id=com.cbreferee&amp;feature=search_result#?t=W251bGwsMSwxLDEsImNvbS5jYnRyZWZlcmVlIl0</a>                                                                                       |
| #GOOG  | Chantu Bantu Jokes       | <a href="https://play.google.com/store/apps/details?id=com.mandeeprekhi.santabanta&amp;feature=search_result#?t=W251bGwsMSwxLDEsImNvbS5tYW5kZWVwcmVraGkuc2FudGFyYXN0I10">https://play.google.com/store/apps/details?id=com.mandeeprekhi.santabanta&amp;feature=search_result#?t=W251bGwsMSwxLDEsImNvbS5tYW5kZWVwcmVraGkuc2FudGFyYXN0I10</a>                           |
| #GOOG  | Cognitive Syles CBT Test | <a href="https://play.google.com/store/apps/details?id=com.excelatlife.cbtttest&amp;feature=search_result#?t=W251bGwsMSwxLDEsImNvbS5leGNlbGF0bGlmZS5jYnR0ZXN0I10">https://play.google.com/store/apps/details?id=com.excelatlife.cbtttest&amp;feature=search_result#?t=W251bGwsMSwxLDEsImNvbS5leGNlbGF0bGlmZS5jYnR0ZXN0I10</a>                                         |
| #GOOG  | Comic Mask               | <a href="https://play.google.com/store/apps/details?id=com.olaworks.automask.comic&amp;feature=search_result#?t=W251bGwsMSwxLDEsImNvbS5vbGF3b3Jrcy5hdXRvbWFzay5jb21pYyJd">https://play.google.com/store/apps/details?id=com.olaworks.automask.comic&amp;feature=search_result#?t=W251bGwsMSwxLDEsImNvbS5vbGF3b3Jrcy5hdXRvbWFzay5jb21pYyJd</a>                         |
| #GOOG  | Comic Mask Lite          | <a href="https://play.google.com/store/apps/details?id=com.olaworks.automask.comic_lite&amp;feature=search_result#?t=W251bGwsMSwxLDEsImNvbS5vbGF3b3Jrcy5hdXRvbWFzay5jb21pY19saXRlIl0">https://play.google.com/store/apps/details?id=com.olaworks.automask.comic_lite&amp;feature=search_result#?t=W251bGwsMSwxLDEsImNvbS5vbGF3b3Jrcy5hdXRvbWFzay5jb21pY19saXRlIl0</a> |
| #GOOG  | Crack Screen             | <a href="https://play.google.com/store/apps/details?id=com.hzwp.BrokenScreen&amp;feature=search_result#?t=W251bGwsMSwxLDEsImNvbS5oendwLkYyb2tlbnJcmVlbiJd">https://play.google.com/store/apps/details?id=com.hzwp.BrokenScreen&amp;feature=search_result#?t=W251bGwsMSwxLDEsImNvbS5oendwLkYyb2tlbnJcmVlbiJd</a>                                                       |
| #GOOG  | Dealing with Depression  | <a href="https://play.google.com/store/apps/details?id=com.wDepression&amp;feature=search_result#?t=W251bGwsMSwxLDEsImNvbS53RGVwcmVzc2lvbiJd">https://play.google.com/store/apps/details?id=com.wDepression&amp;feature=search_result#?t=W251bGwsMSwxLDEsImNvbS53RGVwcmVzc2lvbiJd</a>                                                                                 |
| #GOOG  | Dealing with Depression  | <a href="https://play.google.com/store/apps/details?id=com.wDealingwithDepression&amp;feature=search_result">https://play.google.com/store/apps/details?id=com.wDealingwithDepression&amp;feature=search_result</a>                                                                                                                                                   |

| MARKET | APP NAME                 | LINK                                                                                                                                                                                                                                                                     |
|--------|--------------------------|--------------------------------------------------------------------------------------------------------------------------------------------------------------------------------------------------------------------------------------------------------------------------|
|        |                          | <a href="#"><u>#?</u></a><br><a href="#"><u>t=W251bGwsMSwxLDEslmNvbS53RGVhbGluZ3dpdGhEZXBzZXNzaW9uIl0</u></a>                                                                                                                                                            |
| #GOOG  | Defeat Depression        | <a href="#"><u>https://play.google.com/store/apps/details?id=com.appmk.defeatdepression.AOTMEDHCLGYSDFYXC&amp;feature=search_result#?</u></a><br><a href="#"><u>t=W251bGwsMSwxLDEslmNvbS5hcHBtay5kZWZlYXRkZXByZXNzaW9uLkFPVE1FREhDTEdZU0RGWVhDIIO</u></a>                |
| #GOOG  | Depressed?               | <a href="#"><u>https://play.google.com/store/apps/details?id=com.foncannoninc.depression&amp;feature=search_result#?</u></a><br><a href="#"><u>t=W251bGwsMSwxLDEslmNvbS5mb25jYW5ub25pbmMuZGVwcmVzc2lvbiJd</u></a>                                                        |
| #GOOG  | Depression               | <a href="#"><u>https://play.google.com/store/apps/details?id=air.com.asdspecialist.depression&amp;feature=search_result#?</u></a><br><a href="#"><u>t=W251bGwsMSwxLDEslmFpci5jb20uYXNkc3BIY2lhbGlzdC5kZXByZXNzaW9uIl0</u></a>                                            |
| #GOOG  | Depression               | <a href="#"><u>https://play.google.com/store/apps/details?id=com.simpaddico.flashcards.depression&amp;feature=search_result#?</u></a><br><a href="#"><u>t=W251bGwsMSwxLDEslmNvbS5zaW1wYWWRkaWNvLmZsYXNoY2FyZHMuZGVwcmVzc2lvbiJd</u></a>                                  |
| #GOOG  | Depression               | <a href="#"><u>https://play.google.com/store/apps/details?id=com.focusmedica.depression&amp;feature=search_result#?</u></a><br><a href="#"><u>t=W251bGwsMSwxLDEslmNvbS5mb2N1c21lZGljYS5kZXByZXNzaW9uIl0</u></a>                                                          |
| #GOOG  | Depression               | <a href="#"><u>https://play.google.com/store/apps/details?id=com.vertexmind.DEPRESSIONAMisunderstoodDISEASE.ebw&amp;feature=search_result#?</u></a><br><a href="#"><u>t=W251bGwsMSwxLDEslmNvbS52ZXJ0ZXhtaW5kLkRFUFJFU1NJT05BTWlzdW5kZXJzdG9vZERJU0VBU0UuZWJ3Il0.</u></a> |
| #GOOG  | Depression 101 by WAGmob | <a href="#"><u>https://play.google.com/store/apps/details?id=com.quizmine.depression&amp;feature=search_result#?</u></a><br><a href="#"><u>t=W251bGwsMSwxLDEslmNvbS5xdWl6bWluZS5kZXByZXNzaW9uIl0.</u></a>                                                                |
| #GOOG  | Depression Advice        | <a href="#"><u>https://play.google.com/store/apps/details?id=com.appmakr.app356528&amp;feature=search_result#?</u></a><br><a href="#"><u>t=W251bGwsMSwxLDEslmNvbS5hcHBtYWtyLmFwcD M1NjUyOCJd</u></a>                                                                     |

| MARKET | APP NAME                         | LINK                                                                                                                                                                                                                                                                                                                                                                                                                                      |
|--------|----------------------------------|-------------------------------------------------------------------------------------------------------------------------------------------------------------------------------------------------------------------------------------------------------------------------------------------------------------------------------------------------------------------------------------------------------------------------------------------|
| #GOOG  | Depression and Anxiety           | <a href="https://play.google.com/store/apps/details?id=com.a10187385695068b15b36a349a.a45257883a&amp;feature=search_result#?t=W251bGwsMSwxLDEsImNvbS5hMTAxODczODU2OTUwNjhiMTViMzZhMzQ5YS5hNDUyNTc4ODNhIl0.">https://play.google.com/store/apps/details?id=com.a10187385695068b15b36a349a.a45257883a&amp;feature=search_result#?t=W251bGwsMSwxLDEsImNvbS5hMTAxODczODU2OTUwNjhiMTViMzZhMzQ5YS5hNDUyNTc4ODNhIl0.</a>                         |
| #GOOG  | Depression and Heart Disease     | <a href="https://play.google.com/store/apps/details?id=com.yogi.yogidepressionandcoronaryheartdisease&amp;feature=search_result#?t=W251bGwsMSwxLDEsImNvbS55b2dpLnlvZ2lkZXByZXNzaW9uYW5kY29yb25hcnloZWYyZGRpc2Vhc2UiXQ.">https://play.google.com/store/apps/details?id=com.yogi.yogidepressionandcoronaryheartdisease&amp;feature=search_result#?t=W251bGwsMSwxLDEsImNvbS55b2dpLnlvZ2lkZXByZXNzaW9uYW5kY29yb25hcnloZWYyZGRpc2Vhc2UiXQ.</a> |
| #GOOG  | Depression by Giovanni Lordi     | <a href="https://play.google.com/store/apps/details?id=com.imobilize.depressiongl&amp;feature=search_result#?t=W251bGwsMSwxLDEsImNvbS5pbW9iaWxpemUuZGVwcmVzc2lwbmdsIl0">https://play.google.com/store/apps/details?id=com.imobilize.depressiongl&amp;feature=search_result#?t=W251bGwsMSwxLDEsImNvbS5pbW9iaWxpemUuZGVwcmVzc2lwbmdsIl0</a>                                                                                                 |
| #GOOG  | Depression CBT Self-Help Guide   | <a href="https://play.google.com/store/apps/details?id=com.excelatlife.depression&amp;feature=search_result#?t=W251bGwsMSwxLDEsImNvbS5leGNlbGF0bGlmZS5kZXByZXNzaW9uIl0">https://play.google.com/store/apps/details?id=com.excelatlife.depression&amp;feature=search_result#?t=W251bGwsMSwxLDEsImNvbS5leGNlbGF0bGlmZS5kZXByZXNzaW9uIl0</a>                                                                                                 |
| #GOOG  | Depression Connect               | <a href="https://play.google.com/store/apps/details?id=com.alliancehealth.depressionconnect&amp;feature=search_result#?t=W251bGwsMSwxLDEsImNvbS5hbGxpYW5jZWhlYWx0aC5kZXByZXNzaW9uY29ubmVjdCJd">https://play.google.com/store/apps/details?id=com.alliancehealth.depressionconnect&amp;feature=search_result#?t=W251bGwsMSwxLDEsImNvbS5hbGxpYW5jZWhlYWx0aC5kZXByZXNzaW9uY29ubmVjdCJd</a>                                                   |
| #GOOG  | Depression Diagnosis             | <a href="https://play.google.com/store/apps/details?id=com.easydiagnosis.depression&amp;feature=search_result#?t=W251bGwsMSwxLDEsImNvbS5lYXN5ZGhZ25vc2lzMmRlcHJlc3Npb24iXQ..">https://play.google.com/store/apps/details?id=com.easydiagnosis.depression&amp;feature=search_result#?t=W251bGwsMSwxLDEsImNvbS5lYXN5ZGhZ25vc2lzMmRlcHJlc3Npb24iXQ..</a>                                                                                     |
| #GOOG  | Depression Dog                   | <a href="https://play.google.com/store/apps/details?id=com.amf.depressiondog&amp;feature=search_result#?t=W251bGwsMSwxLDEsImNvbS5hbWYyZGVwcmVzc2lwbmRvZyJd">https://play.google.com/store/apps/details?id=com.amf.depressiondog&amp;feature=search_result#?t=W251bGwsMSwxLDEsImNvbS5hbWYyZGVwcmVzc2lwbmRvZyJd</a>                                                                                                                         |
| #GOOG  | Depression Health Brainwave Lite | <a href="https://play.google.com/store/apps/details?id=imoblife.depressionhelpbrainwave.lite&amp;feature=search_result#?t=W251bGwsMSwxLDEsImltb2JsaWZlImRlcHJlc3Npb25oZWxwYnJhaW53YXZlMxpdGUlXQ">https://play.google.com/store/apps/details?id=imoblife.depressionhelpbrainwave.lite&amp;feature=search_result#?t=W251bGwsMSwxLDEsImltb2JsaWZlImRlcHJlc3Npb25oZWxwYnJhaW53YXZlMxpdGUlXQ</a>                                               |
| #GOOG  | Depression Help                  | <a href="https://play.google.com/store/apps/details?id=stop.depression.tips&amp;feature=search_result#?t=W251bGwsMSwxLDEsInN0b3AuZGVwcmVzc2lubi50aXBzIl0.">https://play.google.com/store/apps/details?id=stop.depression.tips&amp;feature=search_result#?t=W251bGwsMSwxLDEsInN0b3AuZGVwcmVzc2lubi50aXBzIl0.</a>                                                                                                                           |



| MARKET | APP NAME                     | LINK                                                                                                                                                                                                                                                                                                                                                                        |
|--------|------------------------------|-----------------------------------------------------------------------------------------------------------------------------------------------------------------------------------------------------------------------------------------------------------------------------------------------------------------------------------------------------------------------------|
|        |                              | <a href="https://play.google.com/store/apps/details?id=com.t3apps.tamedepression&amp;feature=search_result#?t=W251bGwsMSwxLDEsImNvbS50M2FwcHMudGFtZWRIcHJlc3Npb24iXQ">id=com.t3apps.tamedepression&amp;feature=search_result#?<br/>?t=W251bGwsMSwxLDEsImNvbS50M2FwcHMudGFtZWRIcHJlc3Npb24iXQ</a>                                                                            |
| #GOOG  | Depression Test              | <a href="https://play.google.com/store/apps/details?id=nl.japps.android.depressiontest&amp;feature=search_result#?t=W251bGwsMSwxLDEsIm5sLmphcHBzLmFuZHJvaWQuZGVwcmVzc2lvbnRlc3QiXQ..">https://play.google.com/store/apps/details?id=nl.japps.android.depressiontest&amp;feature=search_result#?<br/>?t=W251bGwsMSwxLDEsIm5sLmphcHBzLmFuZHJvaWQuZGVwcmVzc2lvbnRlc3QiXQ..</a> |
| #GOOG  | Depression Test Demystified  | <a href="https://play.google.com/store/apps/details?id=com.wDepressionTestDemystified&amp;feature=search_result#?t=W251bGwsMSwxLDEsImNvbS53RGVwcmVzc2lvbnRlc3REZW15c3RpZmlZCjJd">https://play.google.com/store/apps/details?id=com.wDepressionTestDemystified&amp;feature=search_result#?<br/>?t=W251bGwsMSwxLDEsImNvbS53RGVwcmVzc2lvbnRlc3REZW15c3RpZmlZCjJd</a>           |
| #GOOG  | Depression Treatment         | <a href="https://play.google.com/store/apps/details?id=com.wDepressionTreatment&amp;feature=search_result#?t=W251bGwsMSwxLDEsImNvbS53RGVwcmVzc2lvbnRyZWY0bWVudCjJd">https://play.google.com/store/apps/details?id=com.wDepressionTreatment&amp;feature=search_result#?<br/>?t=W251bGwsMSwxLDEsImNvbS53RGVwcmVzc2lvbnRyZWY0bWVudCjJd</a>                                     |
| #GOOG  | Drip of Insight Relaxation   | <a href="https://play.google.com/store/apps/details?id=com.mozinc.dripofinsight&amp;feature=search_result#?t=W251bGwsMSwxLDEsImNvbS5tb3ppbmMuZHJpcG9maW5zaWdodCjJd">https://play.google.com/store/apps/details?id=com.mozinc.dripofinsight&amp;feature=search_result#?<br/>?t=W251bGwsMSwxLDEsImNvbS5tb3ppbmMuZHJpcG9maW5zaWdodCjJd</a>                                     |
| #GOOG  | eMood Bipolar Mood Tracker   | <a href="https://play.google.com/store/apps/details?id=my.tracker&amp;feature=search_result#?t=W251bGwsMSwxLDEsIm15LnRyYWNRZXliXQ">https://play.google.com/store/apps/details?id=my.tracker&amp;feature=search_result#?<br/>?t=W251bGwsMSwxLDEsIm15LnRyYWNRZXliXQ</a>                                                                                                       |
| #GOOG  | End Anxiety Brainwave Audio  | <a href="https://play.google.com/store/apps/details?id=com.wReduceAnxietyNow&amp;feature=search_result#?t=W251bGwsMSwxLDEsImNvbS53UmVkdWNIQW54aWV0eU5vdyJd">https://play.google.com/store/apps/details?id=com.wReduceAnxietyNow&amp;feature=search_result#?<br/>?t=W251bGwsMSwxLDEsImNvbS53UmVkdWNIQW54aWV0eU5vdyJd</a>                                                     |
| #GOOG  | End Depression Audio Rhythms | <a href="https://play.google.com/store/apps/details?id=com.wCombatDepressionAudio&amp;feature=search_result#?t=W251bGwsMSwxLDEsImNvbS53Q29tYmF0RGVwcmVzc2lvbkF1ZGlVlI0">https://play.google.com/store/apps/details?id=com.wCombatDepressionAudio&amp;feature=search_result#?<br/>?t=W251bGwsMSwxLDEsImNvbS53Q29tYmF0RGVwcmVzc2lvbkF1ZGlVlI0</a>                             |
| #GOOG  | Extreme Motivational Quotes  | <a href="https://play.google.com/store/apps/details?id=com.via3apps.aextremem872&amp;feature=search_result#?t=W251bGwsMSwxLDEsImNvbS52aWEzYXBwcy5hZXh0cmVtZW04NzliXQ">https://play.google.com/store/apps/details?id=com.via3apps.aextremem872&amp;feature=search_result#?<br/>?t=W251bGwsMSwxLDEsImNvbS52aWEzYXBwcy5hZXh0cmVtZW04NzliXQ</a>                                 |
| #GOOG  | Fight Depression: 8 Tips     | <a href="https://play.google.com/store/apps/details?id=com.kinetixapps.fightdepression&amp;feature=search_res">https://play.google.com/store/apps/details?id=com.kinetixapps.fightdepression&amp;feature=search_res</a>                                                                                                                                                     |



| MARKET | APP NAME                     | LINK                                                                                                                                                                                                                                                                                                                                                                                                                                                                      |
|--------|------------------------------|---------------------------------------------------------------------------------------------------------------------------------------------------------------------------------------------------------------------------------------------------------------------------------------------------------------------------------------------------------------------------------------------------------------------------------------------------------------------------|
| #GOOG  | Learn About Depression       | <a href="https://play.google.com/store/apps/details?id=com.ProjectNotAloneDepressionModule&amp;feature=search_result#?t=W251bGwsMSwxLDEsImNvbS5Qcm9qZWNoTm90QWxvbmVEZXByZXNzaW9uTW9kdWxlll0">https://play.google.com/store/apps/details?id=com.ProjectNotAloneDepressionModule&amp;feature=search_result#?t=W251bGwsMSwxLDEsImNvbS5Qcm9qZWNoTm90QWxvbmVEZXByZXNzaW9uTW9kdWxlll0</a>                                                                                       |
| #GOOG  | Let Go                       | <a href="https://play.google.com/store/apps/details?id=com.araaya.letgo&amp;feature=search_result#?t=W251bGwsMSwxLDEsImNvbS5hcmFheWEubGV0Z28iXQ">https://play.google.com/store/apps/details?id=com.araaya.letgo&amp;feature=search_result#?t=W251bGwsMSwxLDEsImNvbS5hcmFheWEubGV0Z28iXQ</a>                                                                                                                                                                               |
| #GOOG  | Living with BiPolar Disorder | <a href="https://play.google.com/store/apps/details?id=com.LivingWithBiPolarDisorder.book.AOTEFOYEEKEARAIXMZ&amp;feature=search_result#?t=W251bGwsMSwxLDEsImNvbS5MaXZpbmdXaXRoQmlQb2xhcckRpc29yZGVyLmJvb2suQU9URU9GT1IFS0VBUkFJWE1all0">https://play.google.com/store/apps/details?id=com.LivingWithBiPolarDisorder.book.AOTEFOYEEKEARAIXMZ&amp;feature=search_result#?t=W251bGwsMSwxLDEsImNvbS5MaXZpbmdXaXRoQmlQb2xhcckRpc29yZGVyLmJvb2suQU9URU9GT1IFS0VBUkFJWE1all0</a> |
| #GOOG  | Lucid Mind Relaxation        | <a href="https://play.google.com/store/apps/details?id=com.mozinc.lucidmind&amp;feature=search_result#?t=W251bGwsMSwxLDEsImNvbS5tb3ppbmMubHVjaWRtaW5kl10">https://play.google.com/store/apps/details?id=com.mozinc.lucidmind&amp;feature=search_result#?t=W251bGwsMSwxLDEsImNvbS5tb3ppbmMubHVjaWRtaW5kl10</a>                                                                                                                                                             |
| #GOOG  | Major Depression Checker     | <a href="https://play.google.com/store/apps/details?id=net.ikko.majordepressionchecker&amp;feature=search_result#?t=W251bGwsMSwxLDEsIm5ldC5pa2tvLm1ham9yZGVwcmVzc2lvbmNoZWNoZXliXQ..">https://play.google.com/store/apps/details?id=net.ikko.majordepressionchecker&amp;feature=search_result#?t=W251bGwsMSwxLDEsIm5ldC5pa2tvLm1ham9yZGVwcmVzc2lvbmNoZWNoZXliXQ..</a>                                                                                                     |
| #GOOG  | Manifest Heal Relaxation     | <a href="https://play.google.com/store/apps/details?id=com.mozinc.manifestheal&amp;feature=search_result#?t=W251bGwsMSwxLDEsImNvbS5tb3ppbmMubWFuaWZlc3RoZWVfsl10">https://play.google.com/store/apps/details?id=com.mozinc.manifestheal&amp;feature=search_result#?t=W251bGwsMSwxLDEsImNvbS5tb3ppbmMubWFuaWZlc3RoZWVfsl10</a>                                                                                                                                             |
| #GOOG  | Men and Depression           | <a href="https://play.google.com/store/apps/details?id=com.swa.swamenanddepression&amp;feature=search_result#?t=W251bGwsMSwxLDEsImNvbS5zd2Euc3dhbWVuYW5kZGVwcmVzc2lvbiJd">https://play.google.com/store/apps/details?id=com.swa.swamenanddepression&amp;feature=search_result#?t=W251bGwsMSwxLDEsImNvbS5zd2Euc3dhbWVuYW5kZGVwcmVzc2lvbiJd</a>                                                                                                                             |
| #GOOG  | Mindfulness TS               | <a href="https://play.google.com/store/apps/details?id=com.rep.MindFul&amp;feature=search_result#?t=W251bGwsMSwxLDEsImNvbS5yZXAuTWluZEZ1bCJd">https://play.google.com/store/apps/details?id=com.rep.MindFul&amp;feature=search_result#?t=W251bGwsMSwxLDEsImNvbS5yZXAuTWluZEZ1bCJd</a>                                                                                                                                                                                     |
| #GOOG  | Mood Disorder Manual         | <a href="https://play.google.com/store/apps/details?id=com.max.maxmooddisordermanual&amp;feature=search_result#?t=W251bGwsMSwxLDEsImNvbS5tYXgubWF4bW9vZGRpc29yZGVyYbWFudWFfsl10.">https://play.google.com/store/apps/details?id=com.max.maxmooddisordermanual&amp;feature=search_result#?t=W251bGwsMSwxLDEsImNvbS5tYXgubWF4bW9vZGRpc29yZGVyYbWFudWFfsl10.</a>                                                                                                             |

| MARKET | APP NAME                      | LINK                                                                                                                                                                                                                                                                                                                                                                                                                                        |
|--------|-------------------------------|---------------------------------------------------------------------------------------------------------------------------------------------------------------------------------------------------------------------------------------------------------------------------------------------------------------------------------------------------------------------------------------------------------------------------------------------|
| #GOOG  | Mood Elevator & Support       | <a href="https://play.google.com/store/apps/details?id=com.mobihypnos.soft.add69&amp;feature=search_result#?t=W251bGwsMSwxLDEsImNvbS5tb2JpaHlwbm9zLnNvZnQuYWRkNjkiXQ">https://play.google.com/store/apps/details?id=com.mobihypnos.soft.add69&amp;feature=search_result#?t=W251bGwsMSwxLDEsImNvbS5tb2JpaHlwbm9zLnNvZnQuYWRkNjkiXQ</a>                                                                                                       |
| #GOOG  | Mood Tracker By: CTHF         | <a href="https://play.google.com/store/apps/details?id=com.greilly.moodtracker&amp;feature=search_result#?t=W251bGwsMSwxLDEsImNvbS5ncmVpbGx5Lm1vb2R0cmFja2VyIl0">https://play.google.com/store/apps/details?id=com.greilly.moodtracker&amp;feature=search_result#?t=W251bGwsMSwxLDEsImNvbS5ncmVpbGx5Lm1vb2R0cmFja2VyIl0</a>                                                                                                                 |
| #GOOG  | Mood Tracker Depression       | <a href="https://play.google.com/store/apps/details?id=org.radiantmonkeysoftware.moodtrackerdepression&amp;feature=search_result#?t=W251bGwsMSwxLDEsIm9yZy5yYWRpYW50bW9ua2V5c29mdHdhcmUubW9vZHRyYWNrZXJkZXByZXNzaW9uIl0">https://play.google.com/store/apps/details?id=org.radiantmonkeysoftware.moodtrackerdepression&amp;feature=search_result#?t=W251bGwsMSwxLDEsIm9yZy5yYWRpYW50bW9ua2V5c29mdHdhcmUubW9vZHRyYWNrZXJkZXByZXNzaW9uIl0</a> |
| #GOOG  | Nature Sounds Relax and Sleep | <a href="https://play.google.com/store/apps/details?id=com.zodinplex.naturesound&amp;feature=search_result#?t=W251bGwsMSwxLDEsImNvbS56b2RpbmBsZXgubmF0dXJlc291bmQiXQ">https://play.google.com/store/apps/details?id=com.zodinplex.naturesound&amp;feature=search_result#?t=W251bGwsMSwxLDEsImNvbS56b2RpbmBsZXgubmF0dXJlc291bmQiXQ</a>                                                                                                       |
| #GOOG  | NIH Depression Information    | <a href="https://play.google.com/store/apps/details?id=com.incelligence.android.searchnavnihdpi&amp;feature=search_result#?t=W251bGwsMSwxLDEsImNvbS5pbmNlbGxpZ2VuY2UuYW5kcm9pZC5zZWZyY2huYXZuaWhkcGkiXQ">https://play.google.com/store/apps/details?id=com.incelligence.android.searchnavnihdpi&amp;feature=search_result#?t=W251bGwsMSwxLDEsImNvbS5pbmNlbGxpZ2VuY2UuYW5kcm9pZC5zZWZyY2huYXZuaWhkcGkiXQ</a>                                 |
| #GOOG  | Om Chanting                   | <a href="https://play.google.com/store/apps/details?id=com.xrtech.app.omchanting&amp;feature=search_result#?t=W251bGwsMSwxLDEsImNvbS54bHJhdGVjaC5hcHAub21jaGFudGluZyJd">https://play.google.com/store/apps/details?id=com.xrtech.app.omchanting&amp;feature=search_result#?t=W251bGwsMSwxLDEsImNvbS54bHJhdGVjaC5hcHAub21jaGFudGluZyJd</a>                                                                                                   |
| #GOOG  | Operation Reach Out           | <a href="https://play.google.com/store/apps/details?id=suicide.prevention.app&amp;feature=search_result#?t=W251bGwsMSwxLDEsInN1aWNpZGUucHJldmVudGlubi5hcHAiXQ">https://play.google.com/store/apps/details?id=suicide.prevention.app&amp;feature=search_result#?t=W251bGwsMSwxLDEsInN1aWNpZGUucHJldmVudGlubi5hcHAiXQ</a>                                                                                                                     |
| #GOOG  | Overcome Anxiety              | <a href="https://play.google.com/store/apps/details?id=com.bestourism.overcomeanxiety&amp;feature=search_result#?t=W251bGwsMSwxLDEsImNvbS5iZXN0b3VyaXNtLm92ZXJjb21lYW54aWV0eSjd">https://play.google.com/store/apps/details?id=com.bestourism.overcomeanxiety&amp;feature=search_result#?t=W251bGwsMSwxLDEsImNvbS5iZXN0b3VyaXNtLm92ZXJjb21lYW54aWV0eSjd</a>                                                                                 |
| #GOOG  | Overcoming Depression         | <a href="https://play.google.com/store/apps/details?id=com.koolappz.EP77707460001&amp;feature=search_result#?">https://play.google.com/store/apps/details?id=com.koolappz.EP77707460001&amp;feature=search_result#?</a>                                                                                                                                                                                                                     |



| MARKET | APP NAME                          | LINK                                                                                                                                                                                                                                                                                                                                                                                                                                                                    |
|--------|-----------------------------------|-------------------------------------------------------------------------------------------------------------------------------------------------------------------------------------------------------------------------------------------------------------------------------------------------------------------------------------------------------------------------------------------------------------------------------------------------------------------------|
|        |                                   | <a href="#">YW4ucHN5dGVzdHNIbmdmdWxsII0</a>                                                                                                                                                                                                                                                                                                                                                                                                                             |
| #GOOG  | Qi Gond Medication and Relaxation | <a href="https://play.google.com/store/apps/details?id=com.excelatlife.motivation&amp;feature=search_result#?t=W251bGwsMSwxLDEsImNvbS5leGNlbGF0bGlmZS5tb3RpdmF0aW9uII0">https://play.google.com/store/apps/details?id=com.excelatlife.motivation&amp;feature=search_result#?t=W251bGwsMSwxLDEsImNvbS5leGNlbGF0bGlmZS5tb3RpdmF0aW9uII0</a>                                                                                                                               |
| #GOOG  | Refresh Your Brain Relaxation     | <a href="https://play.google.com/store/apps/details?id=com.mozinc.refreshyourbrain&amp;feature=search_result#?t=W251bGwsMSwxLDEsImNvbS5tb3ppbmMucmVmcmVzaHlvdXJicmFpbiJd">https://play.google.com/store/apps/details?id=com.mozinc.refreshyourbrain&amp;feature=search_result#?t=W251bGwsMSwxLDEsImNvbS5tb3ppbmMucmVmcmVzaHlvdXJicmFpbiJd</a>                                                                                                                           |
| #GOOG  | Relaxation Destination            | <a href="https://play.google.com/store/apps/details?id=com.powerapps.relaxationdestination&amp;feature=search_result#?t=W251bGwsMSwxLDEsImNvbS5wb3dlcmFwcHMucmVsYXhhdGlvbmlkZ3RpbmF0aW9uII0">https://play.google.com/store/apps/details?id=com.powerapps.relaxationdestination&amp;feature=search_result#?t=W251bGwsMSwxLDEsImNvbS5wb3dlcmFwcHMucmVsYXhhdGlvbmlkZ3RpbmF0aW9uII0</a>                                                                                     |
| #GOOG  | Showering Dream Relaxation        | <a href="https://play.google.com/store/apps/details?id=com.mozinc.showeringdream&amp;feature=search_result#?t=W251bGwsMSwxLDEsImNvbS5tb3ppbmMuc2hvd2VyYW5nZHJlYW0iXQ">https://play.google.com/store/apps/details?id=com.mozinc.showeringdream&amp;feature=search_result#?t=W251bGwsMSwxLDEsImNvbS5tb3ppbmMuc2hvd2VyYW5nZHJlYW0iXQ</a>                                                                                                                                   |
| #GOOG  | Smiley Slinger                    | <a href="https://play.google.com/store/apps/details?id=com.dylan.slingshot&amp;feature=search_result#?t=W251bGwsMSwxLDEsImNvbS5keWxhbi5zbGluZ3NoY3QiXQ">https://play.google.com/store/apps/details?id=com.dylan.slingshot&amp;feature=search_result#?t=W251bGwsMSwxLDEsImNvbS5keWxhbi5zbGluZ3NoY3QiXQ</a>                                                                                                                                                               |
| #GOOG  | Speak Jesus Christ                | <a href="https://play.google.com/store/apps/details?id=appinventor.ai_4nohype.iam&amp;feature=search_result#?t=W251bGwsMSwxLDEsImFwcGludmVudG9yLmFpXzRub2h5cGUuaWFtII0">https://play.google.com/store/apps/details?id=appinventor.ai_4nohype.iam&amp;feature=search_result#?t=W251bGwsMSwxLDEsImFwcGludmVudG9yLmFpXzRub2h5cGUuaWFtII0</a>                                                                                                                               |
| #GOOG  | Stomping Out Depression           | <a href="https://play.google.com/store/apps/details?id=com.bridgetree.android.tablet.stomping.out.depression&amp;feature=search_result#?t=W251bGwsMSwxLDEsImNvbS5icmlkZ2V0cmVILmFuZlJvaWQudGFibGV0LnN0b21waW5nLm91dC5kZXByZXNzaW9uII0">https://play.google.com/store/apps/details?id=com.bridgetree.android.tablet.stomping.out.depression&amp;feature=search_result#?t=W251bGwsMSwxLDEsImNvbS5icmlkZ2V0cmVILmFuZlJvaWQudGFibGV0LnN0b21waW5nLm91dC5kZXByZXNzaW9uII0</a> |
| #GOOG  | Stress - Anxiety - Depression     | <a href="https://play.google.com/store/apps/details?id=com.andromo.dev117641.app125032&amp;feature=search_result#?t=W251bGwsMSwxLDEsImNvbS5hbmRyb21vLmRldjExNzY0MS5hcHAxMjUwMzliXQ..">https://play.google.com/store/apps/details?id=com.andromo.dev117641.app125032&amp;feature=search_result#?t=W251bGwsMSwxLDEsImNvbS5hbmRyb21vLmRldjExNzY0MS5hcHAxMjUwMzliXQ..</a>                                                                                                   |
| #GOOG  | Stress Test and CBT Self-Help     | <a href="https://play.google.com/store/apps/details?id=com.excelatlife.stress&amp;feature=search_result#?">https://play.google.com/store/apps/details?id=com.excelatlife.stress&amp;feature=search_result#?</a>                                                                                                                                                                                                                                                         |

| MARKET | APP NAME                    | LINK                                                                                                                                                                                                                                                                                                                                                                                                          |
|--------|-----------------------------|---------------------------------------------------------------------------------------------------------------------------------------------------------------------------------------------------------------------------------------------------------------------------------------------------------------------------------------------------------------------------------------------------------------|
|        |                             | <a href="https://play.google.com/store/apps/details?id=com.aldiko.android.oreilly.isbn9780819871954&amp;feature=search_result#?t=W251bGwsMSwxLDEsImNvbS5leGNlbGF0bGlmZS5zdHJlc3MiXQ">t=W251bGwsMSwxLDEsImNvbS5leGNlbGF0bGlmZS5zdHJlc3MiXQ</a>                                                                                                                                                                 |
| #GOOG  | Surviving Depression        | <a href="https://play.google.com/store/apps/details?id=com.aldiko.android.oreilly.isbn9780819871954&amp;feature=search_result#?t=W251bGwsMSwxLDEsImNvbS5hbGRpa28uYW5kcm9pZC5vcmlzYm9mZS50ODcxOTU0I0">https://play.google.com/store/apps/details?id=com.aldiko.android.oreilly.isbn9780819871954&amp;feature=search_result#?t=W251bGwsMSwxLDEsImNvbS5hbGRpa28uYW5kcm9pZC5vcmlzYm9mZS50ODcxOTU0I0</a>           |
| #GOOG  | Surviving Depression        | <a href="https://play.google.com/store/apps/details?id=org.paulin.sd&amp;feature=search_result#?t=W251bGwsMSwxLDEsIm9yZy5wYXVsaW4uc2QiXQ..">https://play.google.com/store/apps/details?id=org.paulin.sd&amp;feature=search_result#?t=W251bGwsMSwxLDEsIm9yZy5wYXVsaW4uc2QiXQ..</a>                                                                                                                             |
| #GOOG  | Symptoms of Depression      | <a href="https://play.google.com/store/apps/details?id=com.wSymptomsOfDepression&amp;feature=search_result#?t=W251bGwsMSwxLDEsImNvbS53U3ltcHRvbXNPZkRlcHJlc3Npb24iXQ">https://play.google.com/store/apps/details?id=com.wSymptomsOfDepression&amp;feature=search_result#?t=W251bGwsMSwxLDEsImNvbS53U3ltcHRvbXNPZkRlcHJlc3Npb24iXQ</a>                                                                         |
| #GOOG  | Teen Depression Connect     | <a href="https://play.google.com/store/apps/details?id=com.alliancehealth.teendepressionconnect&amp;feature=search_result#?t=W251bGwsMSwxLDEsImNvbS5hbGxpYW5jZWwhlYWx0aC50ZWVuZGVvcmlzYm9mZS50ODcxOTU0I0">https://play.google.com/store/apps/details?id=com.alliancehealth.teendepressionconnect&amp;feature=search_result#?t=W251bGwsMSwxLDEsImNvbS5hbGxpYW5jZWwhlYWx0aC50ZWVuZGVvcmlzYm9mZS50ODcxOTU0I0</a> |
| #GOOG  | Teenage Depression          | <a href="https://play.google.com/store/apps/details?id=com.koolappz.EP77900910001&amp;feature=search_result#?t=W251bGwsMSwxLDEsImNvbS5rb29sYXBwei5FUDc3OTAwOTEwMDAxI0">https://play.google.com/store/apps/details?id=com.koolappz.EP77900910001&amp;feature=search_result#?t=W251bGwsMSwxLDEsImNvbS5rb29sYXBwei5FUDc3OTAwOTEwMDAxI0</a>                                                                       |
| #GOOG  | Ten Tips to Ease Depression | <a href="https://play.google.com/store/apps/details?id=com.tendepressionreva&amp;feature=search_result#?t=W251bGwsMSwxLDEsImNvbS50ZW5kZXByZXNzaW9ucmV2YSJd">https://play.google.com/store/apps/details?id=com.tendepressionreva&amp;feature=search_result#?t=W251bGwsMSwxLDEsImNvbS50ZW5kZXByZXNzaW9ucmV2YSJd</a>                                                                                             |
| #GOOG  | The 72 Names of God         | <a href="https://play.google.com/store/apps/details?id=com.kabbalah.the72names&amp;feature=search_result#?t=W251bGwsMSwxLDEsImNvbS5rYWJiYWxhaC50aGU3Mm5hbWVzI0">https://play.google.com/store/apps/details?id=com.kabbalah.the72names&amp;feature=search_result#?t=W251bGwsMSwxLDEsImNvbS5rYWJiYWxhaC50aGU3Mm5hbWVzI0</a>                                                                                     |
| #GOOG  | The Art of Loving Yourself  | <a href="https://play.google.com/store/apps/details?id=com.appmk.magazine.AOTINCZLYVUKCSPV&amp;feature=search_result#?t=W251bGwsMSwxLDEsImNvbS5hcHBtay5tYWdhemluZS5BT1RJTkNaTFIwVUtDU1BWII0">https://play.google.com/store/apps/details?id=com.appmk.magazine.AOTINCZLYVUKCSPV&amp;feature=search_result#?t=W251bGwsMSwxLDEsImNvbS5hcHBtay5tYWdhemluZS5BT1RJTkNaTFIwVUtDU1BWII0</a>                           |
| #GOOG  | The Depression Predictor    | <a href="https://play.google.com/store/apps/details?id=com.thedoctorsays.depressionpredictor&amp;feature=search_result#?t=W251bGwsMSwxLDEsImNvbS50aGVkb2N0b3JzYXlz">https://play.google.com/store/apps/details?id=com.thedoctorsays.depressionpredictor&amp;feature=search_result#?t=W251bGwsMSwxLDEsImNvbS50aGVkb2N0b3JzYXlz</a>                                                                             |

| MARKET | APP NAME                       | LINK                                                                                                                                                                                                                                                                                                                                                                                                                                                                |
|--------|--------------------------------|---------------------------------------------------------------------------------------------------------------------------------------------------------------------------------------------------------------------------------------------------------------------------------------------------------------------------------------------------------------------------------------------------------------------------------------------------------------------|
|        |                                | <a href="https://play.google.com/store/apps/details?id=com.LmRlcHJlc3Npb25wcmVkaWN0b3liXQ">LmRlcHJlc3Npb25wcmVkaWN0b3liXQ</a>                                                                                                                                                                                                                                                                                                                                       |
| #GOOG  | The Natural Depression Cures   | <a href="https://play.google.com/store/apps/details?id=com.NaturalDepressionCures.AOTECEPPURCCMDTNA&amp;feature=search_result#?t=W251bGwsMSwxLDEsImNvbS50YXR1cmFsRGVwcmVzc2lvcnN1cmVzLkFPVEVDRVBQVVJDQ01EVE5BIlQ">https://play.google.com/store/apps/details?id=com.NaturalDepressionCures.AOTECEPPURCCMDTNA&amp;feature=search_result#?t=W251bGwsMSwxLDEsImNvbS50YXR1cmFsRGVwcmVzc2lvcnN1cmVzLkFPVEVDRVBQVVJDQ01EVE5BIlQ</a>                                       |
| #GOOG  | Thunder Nap Sleep              | <a href="https://play.google.com/store/apps/details?id=com.mozinc.thundernap&amp;feature=search_result#?t=W251bGwsMSwxLDEsImNvbS5tb3ppbmMudGh1bmRlcm5hcCJd">https://play.google.com/store/apps/details?id=com.mozinc.thundernap&amp;feature=search_result#?t=W251bGwsMSwxLDEsImNvbS5tb3ppbmMudGh1bmRlcm5hcCJd</a>                                                                                                                                                   |
| #GOOG  | Thunder Relief Relaxations     | <a href="https://play.google.com/store/apps/details?id=com.mozinc.thunderrelief&amp;feature=search_result#?t=W251bGwsMSwxLDEsImNvbS5tb3ppbmMudGh1bmRlcnJlbGllZiJd">https://play.google.com/store/apps/details?id=com.mozinc.thunderrelief&amp;feature=search_result#?t=W251bGwsMSwxLDEsImNvbS5tb3ppbmMudGh1bmRlcnJlbGllZiJd</a>                                                                                                                                     |
| #GOOG  | Tips to Beat Depression        | <a href="https://play.google.com/store/apps/details?id=com.BeatDepressionToday.book.AOTQRFWGFSDRZKOF&amp;feature=search_result#?t=W251bGwsMSwxLDEsImNvbS5CZWFORGVwcmVzc2lvcnRvZGF5LmJvb2suQU9UUUVJGV0dGU1IEUlpLT0YiXQ..">https://play.google.com/store/apps/details?id=com.BeatDepressionToday.book.AOTQRFWGFSDRZKOF&amp;feature=search_result#?t=W251bGwsMSwxLDEsImNvbS5CZWFORGVwcmVzc2lvcnRvZGF5LmJvb2suQU9UUUVJGV0dGU1IEUlpLT0YiXQ..</a>                         |
| #GOOG  | Treatment for Depression       | <a href="https://play.google.com/store/apps/details?id=com.wTreatmentForDepression&amp;feature=search_result#?t=W251bGwsMSwxLDEsImNvbS53VHJlYXRtZW50Rm9yRGVwcmVzc2lvcnJd">https://play.google.com/store/apps/details?id=com.wTreatmentForDepression&amp;feature=search_result#?t=W251bGwsMSwxLDEsImNvbS53VHJlYXRtZW50Rm9yRGVwcmVzc2lvcnJd</a>                                                                                                                       |
| #GOOG  | Truth About BiPolar Disorder   | <a href="https://play.google.com/store/apps/details?id=com.TruthAboutBiPolarDisorder.book.AOTEFGQFVJAQSAYVL&amp;feature=search_result#?t=W251bGwsMSwxLDEsImNvbS5UcnV0aEFib3V0QmlQb2xhcRpc29yZGVyLmJvb2suQU9URU9GR1FGVkpBUVNBWVZMIlQ">https://play.google.com/store/apps/details?id=com.TruthAboutBiPolarDisorder.book.AOTEFGQFVJAQSAYVL&amp;feature=search_result#?t=W251bGwsMSwxLDEsImNvbS5UcnV0aEFib3V0QmlQb2xhcRpc29yZGVyLmJvb2suQU9URU9GR1FGVkpBUVNBWVZMIlQ</a> |
| #GOOG  | Vanitas                        | <a href="https://play.google.com/store/apps/details?id=com.taleoftales.Vanitas&amp;feature=search_result#?t=W251bGwsMSwxLDEsImNvbS50YWxlb2Z0YWxlcyc5WYW5pdGFzIlQ">https://play.google.com/store/apps/details?id=com.taleoftales.Vanitas&amp;feature=search_result#?t=W251bGwsMSwxLDEsImNvbS50YWxlb2Z0YWxlcyc5WYW5pdGFzIlQ</a>                                                                                                                                       |
| #GOOG  | Weed Strains 3D+ Join Together | <a href="https://play.google.com/store/apps/details?id=com.alphakua.jointogether&amp;feature=search_result#?t=W251bGwsMSwxLDEsImNvbS5hbHB0YWt1YS5qb2ludG9nZXRoZXliXQ..">https://play.google.com/store/apps/details?id=com.alphakua.jointogether&amp;feature=search_result#?t=W251bGwsMSwxLDEsImNvbS5hbHB0YWt1YS5qb2ludG9nZXRoZXliXQ..</a>                                                                                                                           |
| #GOOG  | WhatsMyM3                      | <a href="https://play.google.com/store/apps/details?id=com.mymoodmonitor.whatsmym3&amp;feature=search_r">https://play.google.com/store/apps/details?id=com.mymoodmonitor.whatsmym3&amp;feature=search_r</a>                                                                                                                                                                                                                                                         |

| MARKET       | APP NAME                           | LINK                                                                                                                                                                                                                                                                                                                                                                                                                                                                                                                       |
|--------------|------------------------------------|----------------------------------------------------------------------------------------------------------------------------------------------------------------------------------------------------------------------------------------------------------------------------------------------------------------------------------------------------------------------------------------------------------------------------------------------------------------------------------------------------------------------------|
|              |                                    | <a href="#">esult#?<br/>t=W251bGwsMSwxLDEslmNvbS5teW1vb2Rtb25pdG9y<br/>LndoYXRzbXltMyJd</a>                                                                                                                                                                                                                                                                                                                                                                                                                                |
| #GOOG        | Words that Changed Lives           | <a href="https://play.google.com/store/apps/details?id=com.highonsms.famouspeoplequotes&amp;feature=search_result#?&amp;hl=en&amp;gl=us&amp;referrer=utm_source%3Dgoogle-ads&amp;utm_medium%3Dcpc&amp;utm_campaign%3Dwords-that-changed-lives&amp;utm_term%3Dwords-that-changed-lives&amp;utm_content%3Dwords-that-changed-lives">https://play.google.com/store/apps/details?id=com.highonsms.famouspeoplequotes&amp;feature=search_result#?<br/>t=W251bGwsMSwxLDEslmNvbS5oaWdob25zbXMuZm<br/>Ftb3VzcGVvcGxlXVvdGVzIl0</a> |
| #NOKIA       | Business Motivation                | <a href="http://store.ovi.com/content/327244?clickSource=search&amp;pos=4">http://store.ovi.com/content/327244?<br/>clickSource=search&amp;pos=4</a>                                                                                                                                                                                                                                                                                                                                                                       |
| #NOKIA       | Health Tips                        | <a href="http://store.ovi.com/content/351614?clickSource=search&amp;pos=3">http://store.ovi.com/content/351614?<br/>clickSource=search&amp;pos=3</a>                                                                                                                                                                                                                                                                                                                                                                       |
| #NOKIA       | How Depressed Are You?             | <a href="http://store.ovi.com/content/298105?clickSource=search&amp;pos=5">http://store.ovi.com/content/298105?<br/>clickSource=search&amp;pos=5</a>                                                                                                                                                                                                                                                                                                                                                                       |
| #NOKIA       | Italk to God - Message, NRSV, NASB | <a href="http://store.ovi.com/content/23030?clickSource=search&amp;pos=5">http://store.ovi.com/content/23030?<br/>clickSource=search&amp;pos=5</a>                                                                                                                                                                                                                                                                                                                                                                         |
| #NOKIA       | Mental Health for Muslims          | <a href="http://store.ovi.com/content/44607?clickSource=search&amp;pos=4">http://store.ovi.com/content/44607?<br/>clickSource=search&amp;pos=4</a>                                                                                                                                                                                                                                                                                                                                                                         |
| #NOKIA       | MoodJournal                        | <a href="http://store.ovi.com/content/18360?clickSource=search&amp;pos=10">http://store.ovi.com/content/18360?<br/>clickSource=search&amp;pos=10</a>                                                                                                                                                                                                                                                                                                                                                                       |
| #WINDOW<br>S | Barometer                          | <a href="http://www.windowsphone.com/en-ca/store/app/barometer/7b54e1e0-5104-4413-ad29-4d2262c77474">http://www.windowsphone.com/en-<br/>ca/store/app/barometer/7b54e1e0-5104-4413-ad29-<br/>4d2262c77474</a>                                                                                                                                                                                                                                                                                                              |
| #WINDOW<br>S | Depression Aid                     | <a href="http://www.windowsphone.com/en-ca/store/app/depression-aid/3b9ba662-a0ad-46f4-9568-671e04738c3c">http://www.windowsphone.com/en-<br/>ca/store/app/depression-aid/3b9ba662-a0ad-46f4-9568-<br/>671e04738c3c</a>                                                                                                                                                                                                                                                                                                    |
| #WINDOW<br>S | Depression Test                    | <a href="http://www.windowsphone.com/en-ca/store/app/depression-test/82b5ad73-1ea7-4d14-ba57-8bf2db6879bb">http://www.windowsphone.com/en-<br/>ca/store/app/depression-test/82b5ad73-1ea7-4d14-<br/>ba57-8bf2db6879bb</a>                                                                                                                                                                                                                                                                                                  |
| #WINDOW<br>S | Depression Test (Quick)            | <a href="http://www.windowsphone.com/en-ca/store/app/depression-test-quick/89bc4d44-05ef-45ab-a853-df686d0cdc57">http://www.windowsphone.com/en-<br/>ca/store/app/depression-test-quick/89bc4d44-05ef-<br/>45ab-a853-df686d0cdc57</a>                                                                                                                                                                                                                                                                                      |
| #WINDOW<br>S | Heal Depression                    | <a href="http://www.windowsphone.com/en-ca/store/app/heal-depression/6dd07478-fd44-40ab-a819-34a3c428b2cf">http://www.windowsphone.com/en-ca/store/app/heal-<br/>depression/6dd07478-fd44-40ab-a819-34a3c428b2cf</a>                                                                                                                                                                                                                                                                                                       |
| #WINDOW<br>S | Hynogear                           | <a href="http://www.windowsphone.com/en-ca/store/app/hg/dacd32a5-a687-4a05-a3d7-054550ba47f2">http://www.windowsphone.com/en-<br/>ca/store/app/hg/dacd32a5-a687-4a05-a3d7-<br/>054550ba47f2</a>                                                                                                                                                                                                                                                                                                                            |
| #WINDOW<br>S | Light at the End fo the Tunnel     | <a href="http://www.windowsphone.com/en-ca/store/app/light-at-the-end-of-the-tunnel/3ce90f49-4f4d-40e0-9420-71f6d83604c7">http://www.windowsphone.com/en-ca/store/app/light-at-<br/>the-end-of-the-tunnel/3ce90f49-4f4d-40e0-9420-<br/>71f6d83604c7</a>                                                                                                                                                                                                                                                                    |
| #WINDOW      | Mood Tracker                       | <a href="http://www.windowsphone.com/en-">http://www.windowsphone.com/en-</a>                                                                                                                                                                                                                                                                                                                                                                                                                                              |

| MARKET       | APP NAME                                      | LINK                                                                                                                                                                                                                                                                |
|--------------|-----------------------------------------------|---------------------------------------------------------------------------------------------------------------------------------------------------------------------------------------------------------------------------------------------------------------------|
| S            |                                               | <a href="http://www.windowsphone.com/en-ca/store/app/moodtracker/98bbaba0-6b1c-4eb7-a512-d2b387d89d03">ca/store/app/moodtracker/98bbaba0-6b1c-4eb7-a512-d2b387d89d03</a>                                                                                            |
| #WINDOW<br>S | Mood Tracker (Full)                           | <a href="http://www.windowsphone.com/en-ca/store/app/moodtracker/e7159641-69bb-4034-af96-dca3714386df">http://www.windowsphone.com/en-ca/store/app/moodtracker/e7159641-69bb-4034-af96-dca3714386df</a>                                                             |
| #WINDOW<br>S | The Yellow Wallpaper by Listen and Live Audio | <a href="http://www.windowsphone.com/en-ca/store/app/the-yellow-wallpaper-by-listen-live-audio/88404b57-5c46-42b2-884a-1b5bb576bef8">http://www.windowsphone.com/en-ca/store/app/the-yellow-wallpaper-by-listen-live-audio/88404b57-5c46-42b2-884a-1b5bb576bef8</a> |
| #WINDOW<br>S | What Now                                      | <a href="http://www.windowsphone.com/en-ca/store/app/what-now/1753b84e-ed52-4253-a936-cde0c4f71312">http://www.windowsphone.com/en-ca/store/app/what-now/1753b84e-ed52-4253-a936-cde0c4f71312</a>                                                                   |
